# Supplementary material
Source: PubMed Central journal article supplement (PMC5338658)
Supplement: supp_pp.16.01743_PP2016-01215DR1_Supplemental_Figure_2.pdf [file supp_pp.16.01743_PP2016-01215DR1_Supplemental_Figure_2.pdf]

Figure S2 Bürstenbinder et al.

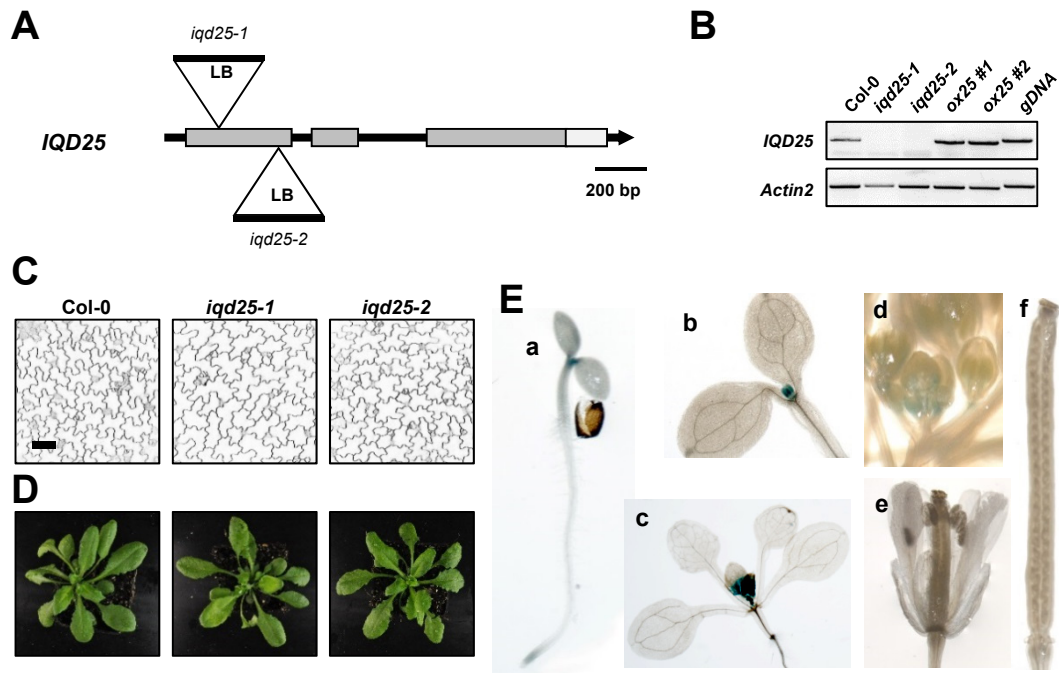

**Supplemental Figure 2. Phenotypes of *iqd25* Mutant Lines and Expression Analysis of *ProIQD25:GFP-GUS*.**

A, Gene model and position of the T-DNA insertions in *iqd25-1* and *iqd25-2* mutants. B, RT-PCR analysis of *IQD25* transcript levels in Col-0, two T-DNA insertion lines (*iqd25-1* and *iqd25-2*) and in 2 independent *Pro35S:IQD25 A. thaliana* lines (*ox25 #1* and *ox25 #2*). *ACTIN2* was included as control for RT efficiency and for semi-quantitative analysis of *IQD25* transcript levels. C, Epidermis pavement cell shape in cotyledons of Col-0 and *iqd25* loss-of-function lines (top panels). The scale bar represents 50  $\mu$ m. D, Shoots of 4-week-old Col-0 and *iqd25* mutant plants grown on soil under long-day conditions. E, Histochemical GUS analysis of transgenic *ProIQD25:GFP-GUS A. thaliana* seedlings. a, 4-d-old seedling, b, c shoots of b) 6-d-old and c) 10-d-old seedlings, and in d) flower buds, e) flowers, and f) siliques of 5-week-old plants.
