# Supplementary material
Source: PubMed Central journal article supplement (PMC5338658)
Supplement: supp_pp.16.01743_PP2016-01215DR1_Supplemental_Figure_5.pdf [file supp_pp.16.01743_PP2016-01215DR1_Supplemental_Figure_5.pdf]

Figure S5 Bürstenbinder et al.

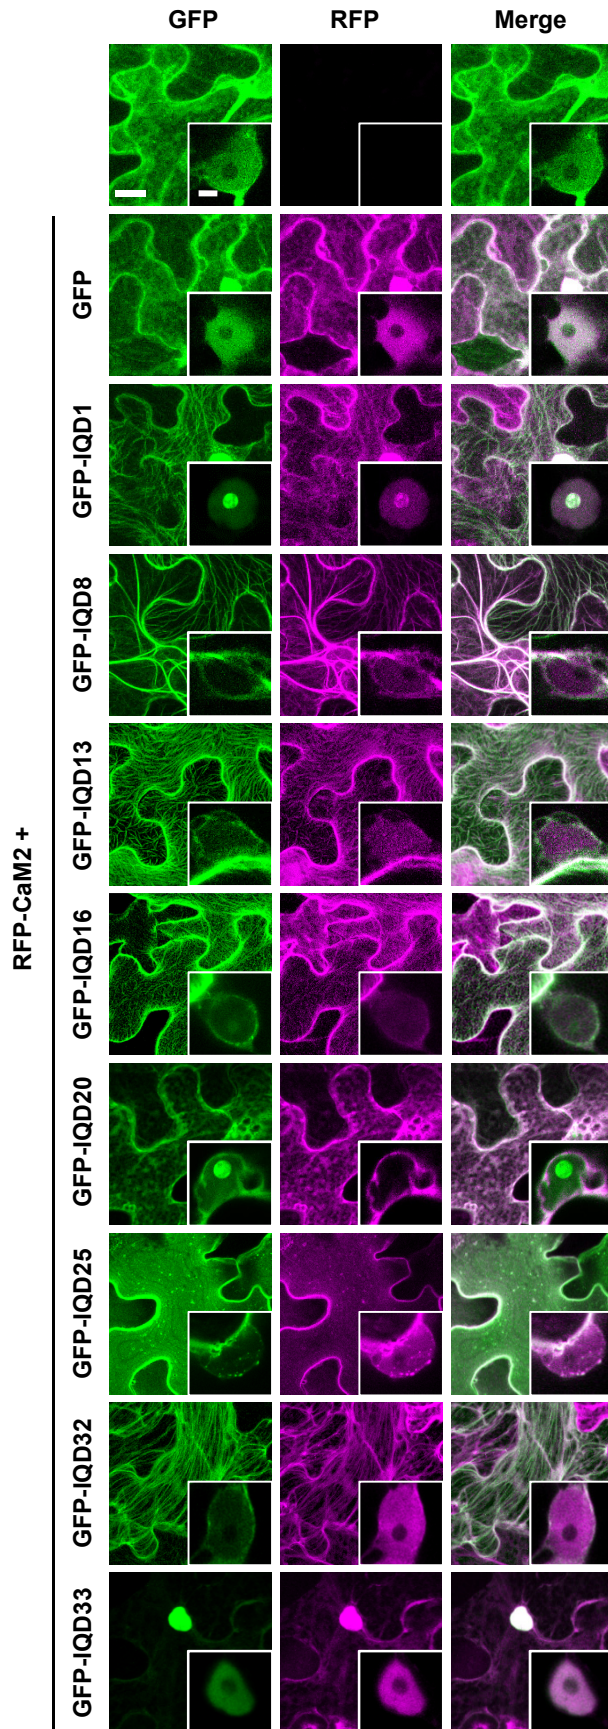

**Supplemental Figure 5. Co-Expression Assays of GFP-IQD Fusions with RFP-CaM2**

Z-stack images of cells (co)-expressing GFP, or GFP-IQD fusions with RFP-CaM2. Insets, single optical sections of nuclei. Left column, GFP signals, center column, RFP signals, right column, merged images. Scale bars, 20  $\mu\text{m}$  and 5  $\mu\text{m}$  (insets).
