# Supplementary material
Source: PubMed Central journal article supplement (PMC5338658)
Supplement: supp_pp.16.01743_PP2016-01215DR1_Supplemental_Table_2.pdf [file supp_pp.16.01743_PP2016-01215DR1_Supplemental_Table_2.pdf]

**Supplemental Table 2.** Gene Identifiers and Clone Information.

| Gene name    | Gene model  | Primer Orientation |      | Position relative to ATG |      | Vector      |
|--------------|-------------|--------------------|------|--------------------------|------|-------------|
|              |             | Fwd                | Rev  | Start                    | Stop |             |
| <i>IQD1</i>  | At3g09710.1 | I108               | I109 | 1                        | 1365 | pENTR/dTOPO |
| <i>IQD2</i>  | At5g03040.1 | I110               | I111 | 1                        | 1386 | pENTR/dTOPO |
| <i>IQD3</i>  | At3g52290.1 | I112               | I113 | 1                        | 1293 | pENTR/dTOPO |
| <i>IQD4</i>  | At2g26410.1 | I114               | I115 | 1                        | 1584 | pENTR/dTOPO |
| <i>IQD5</i>  | At3g22190.1 | I800               | I801 | 1                        | 1269 | pENTR3CUSER |
| <i>IQD6</i>  | At2g26180.1 | I118               | I119 | 1                        | 1251 | pENTR/dTOPO |
| <i>IQD7</i>  | At1g17480.1 | I120               | I121 | 1                        | 1116 | pENTR/dTOPO |
| <i>IQD8</i>  | At1g72670.1 | I222               | I223 | 1                        | 1245 | pENTR/dTOPO |
| <i>IQD9</i>  | At2g33990.1 | I124               | I125 | 1                        | 792  | pENTR/dTOPO |
| <i>IQD10</i> | At3g15050.1 | I126               | I127 | 1                        | 780  | pENTR/dTOPO |
| <i>IQD11</i> | At5g13460.1 | I128               | I129 | 1                        | 1332 | pENTR/dTOPO |
| <i>IQD12</i> | At5g03960.1 | I130               | I131 | 1                        | 1212 | pENTR/dTOPO |
| <i>IQD13</i> | At3g59690.1 | I132               | I133 | 1                        | 1554 | pENTR/dTOPO |
| <i>IQD14</i> | At2g43680.1 | I134               | I135 | 1                        | 2010 | pENTR/dTOPO |
| <i>IQD15</i> | At3g49380.1 | I136               | I137 | 1                        | 1059 | pENTR/dTOPO |
| <i>IQD16</i> | At4g10640.1 | I138               | I139 | 1                        | 1272 | pENTR/dTOPO |
| <i>IQD17</i> | At4g00820.1 | I140               | I141 | 1                        | 1605 | pENTR/dTOPO |
| <i>IQD18</i> | At1g01110.2 | I142               | I143 | 1                        | 1584 | pENTR/dTOPO |
| <i>IQD19</i> | At4g14750.1 | I144               | I145 | 1                        | 1164 | pENTR/dTOPO |
| <i>IQD20</i> | At3g51380.1 | I146               | I147 | 1                        | 312  | pENTR/dTOPO |
| <i>IQD21</i> | At3g49260.1 | I148               | I149 | 1                        | 1419 | pENTR/dTOPO |
| <i>IQD22</i> | At4g23060.1 | I150               | I151 | 1                        | 1455 | pENTR/dTOPO |
| <i>IQD23</i> | At5g62070.1 | I152               | I153 | 1                        | 1212 | pENTR/dTOPO |
| <i>IQD24</i> | At5g07240.1 | I154               | I155 | 1                        | 1206 | pENTR/dTOPO |
| <i>IQD25</i> | At4g29150.1 | I156               | I157 | 1                        | 1200 | pENTR/dTOPO |
| <i>IQD26</i> | At3g16490.1 | I158               | I159 | 1                        | 1170 | pENTR/dTOPO |
| <i>IQD27</i> | At1g51960.1 | I160               | I161 | 1                        | 1056 | pENTR/dTOPO |
| <i>IQD28</i> | At1g14380.1 | I162               | I163 | 1                        | 1995 | pENTR/dTOPO |
| <i>IQD29</i> | At2g02790.2 | I164               | I165 | 1                        | 1763 | pENTR/dTOPO |

SUPPLEMENTAL DATA. Bürstenbinder et al.

|                       |             |       |       |                      |       |             |
|-----------------------|-------------|-------|-------|----------------------|-------|-------------|
| <i>IQD30</i>          | At1g18840.1 | I873  | I874  | 1                    | 1719  | pENTR3CUSER |
| <i>IQD31</i>          | At1g74690.1 | I168  | I169  | 1                    | 1764  | pENTR/dTOPO |
| <i>IQD32</i>          | At1g19870.1 | I170  | I171  | 1                    | 2385  | pENTR/dTOPO |
| <i>IQD33</i>          | At5g35670.1 | I172  | I173  | 1                    | 1329  | pENTR/dTOPO |
| <i>TUA5</i>           | At5g19780.1 | A019  | A020  | 1                    | 1353  | pENTR/dTOPO |
| <i>PDLP1</i>          | At5g43980.1 | A027  | A028  | 1                    | 909   | pENTR/dTOPO |
| <i>TRM1</i>           | At3g02170.1 | I752  | I753  | 1                    | 2718  | pDONR221    |
| <i>Rem6.6</i>         | At1g13920   | I1378 | I1379 | 1                    | 1038  | pDONR207    |
| <i>Rem6.7</i>         | At5g61280   | I1374 | I1375 | 1                    | 792   | pDONR207    |
| <i>ProIQD11</i>       | At5g13460   | I192  | I193  | -1                   | -1253 | pENTR/dTOPO |
| <i>ProIQD14</i>       | At3g59690   | I198  | I199  | -1                   | -1868 | pENTR/dTOPO |
| <i>ProIQD16</i>       | At4g10640   | I202  | I203  | -1                   | -1110 | pENTR/dTOPO |
| <i>ProIQD25</i>       | At4g29150   | I220  | I221  | -1                   | -1090 | pENTR/dTOPO |
| <i>ProIQD8:IQD8</i>   | At1g72670.1 | I250  | I1251 | -688<br>(intergenic) | 1757  | pDONR221    |
| <i>ProIQD14:IQD14</i> | At2g43680.1 | I1468 | I1469 | -1868                | 2283  | pDONR221    |
| <i>ProIQD16:IQD16</i> | At4g10640.1 | I1234 | I1235 | -1110                | 2311  | pDONR221    |
| <i>ProIQD20:IQD20</i> | At3g51380.1 | I1380 | I1381 | -2201                | 388   | pDONR221    |
| <i>ProIQD25:IQD25</i> | At4g29150.1 | I1382 | I1383 | -1090                | 1568  | pDONR221    |
| <i>ProIQD28:IQD28</i> | At1g14380.1 | I1369 | I1370 | -1520                | 2480  | pDONR221    |
