# Supplementary material
Source: PubMed Central journal article supplement (PMC5338658)
Supplement: supp_pp.16.01743_PP2016-01215DR1_Supplemental_Table_3.pdf [file supp_pp.16.01743_PP2016-01215DR1_Supplemental_Table_3.pdf]

**Supplemental Table 3.** Primer Combinations Used for qPCR, RT-PCR and Genotyping.

|                         |                       | Primer Orientation |      | Position relative to ATG in genomicDNA |      | Amplicon length |
|-------------------------|-----------------------|--------------------|------|----------------------------------------|------|-----------------|
|                         |                       | Fwd                | Rev  |                                        |      |                 |
| <i>iqd16</i> genotyping | WT allele             | I035               | I036 | 993                                    | 1849 | 857             |
|                         | Insert                | A004               | I036 | SALK_LB                                | 1849 | 416-616         |
| <i>iqd25</i> genotyping | WT allele             | I053               | I054 | -369                                   | 537  | 855             |
|                         | Insert <i>iqd25-1</i> | A004               | I054 | SALK_LB                                | 537  | 482-732         |
|                         | Insert <i>iqd25-2</i> | A004               | I054 | SALK_LB                                | 537  | 330-530         |
|                         |                       |                    |      | Position relative to ATG in CDS        |      |                 |
| <i>IQD16</i> qPCR       | At4g10640.1           | I409               | I410 | 757                                    | 840  | 84              |
| <i>PP2AA3</i> qPCR      | At1g13320.1           | A015               | A016 | 824                                    | 897  | 73              |
| <i>IQD16</i> RT-PCR     | At4g10640.1           | I035               | I036 | 564                                    | 807  | 244             |
| <i>IQD11</i> RT-PCR     | At5g13460.1           | I088               | I089 | 3                                      | 402  | 400             |
| <i>IQD14</i> RT-PCR     | At3g59690.1           | I029               | I030 | 1                                      | 643  | 643             |
| <i>IQD25</i> RT-PCR     | At4g29150.1           | I095               | I096 | 56                                     | 542  | 487             |
| <i>ACTIN2</i> RT-PCR    | At3g18780.2           | A005               | A006 | 695                                    | 1121 | 427             |
