# Supplementary material
Source: PubMed Central journal article supplement (PMC5338658)
Supplement: supp_pp.16.01743_PP2016-01215DR1_Supplemental_Table_4.pdf [file supp_pp.16.01743_PP2016-01215DR1_Supplemental_Table_4.pdf]

**Supplemental Table 4.** Primer Sequences.

| Primer | Sequence(5'→3')                |
|--------|--------------------------------|
| I108   | CACCATGGTTAAAAAAGCGAAATGGC     |
| I109   | TCACGGCGTTCTCTCTGC             |
| I110   | CACCATGGGGAAAAAAGCTAAATGGT     |
| I111   | TCAGCTGCCTGCTCCGTT             |
| I112   | CACCATGGGTAAGAGTTGGTTTTAG      |
| I113   | TTAAGCAAGATTAGTATCTTTCTTAGTAA  |
| I114   | CACCATGGGTAAGAAGCTGTTAACATGTG  |
| I115   | TTAACTGCTACCACCATTTCTTCTC      |
| I800   | GGCCATTUATGGGAAGATCTCCAGCTTCT  |
| I801   | GGTGATTUATGCAAGCCTCTGTTTTATTGG |
| I118   | CACCATGGGTGCTTCAGGGAAAT        |
| I119   | TTAACCTCTCGGCTTCTCGA           |
| I120   | CACCATGGGTGGGTCAGGAAATT        |
| I121   | TTAGCTTCGCTGGCTCTTG            |
| I122   | CACCATGGGTGGCTCTGGAAATT        |
| I123   | TTAGCCTCTCTGGCTCTTTGC          |
| I124   | CACCATGGGTTCTGGGAATTTGATT      |
| I125   | TCAAGCACCTGGAAATGACA           |
| I126   | CACCATGGGATCTGGATGGCTG         |
| I127   | TTATCCGGAACCAGGCTTT            |
| I128   | CACCATGGCTAAGAAGAAGGGCTTG      |
| I129   | TCATCTCAAGCTGCTCTGCTT          |
| I130   | CACCATGGCGAAGAGGAGGTGCG        |
| I131   | TCAACAATTATGTTGATATGTGGTCA     |
| I132   | CACCATGGGGAAGAAAGGAAGTTG       |
| I133   | TCACGCAAATCTGTAAAAAGCC         |
| I134   | CACCATGGTGAAGAAAGGAAGTTGGTT    |
| I135   | TCACACAAATCTGTAAATTCCTTTC      |
| I136   | CACCATGGGGAAAACCGACGGA         |
| I137   | TTAGTACTGAAAATCTTCGTGAGCA      |
| I138   | CACCATGGCTAAAAAGAACGGAACG      |
| I139   | TCACTTTAACCACCGGAGCT           |
| I140   | CACCATGGGTAAGAAGAGCGGTTCT      |
| I141   | TCATCTTAACCATCGCCTATAATC       |

## SUPPLEMENTAL DATA. Bürstenbinder et al.

|      |                                                       |
|------|-------------------------------------------------------|
| I142 | CACCATGGGGAAAAAGAACGGC                                |
| I143 | TCATCTAAGCCAATTCCTAAAGTCA                             |
| I144 | CACCATGGGGAAAAGTAGCAAATGG                             |
| I145 | TCAGTACATGTTGTTGTTTCCCTG                              |
| I146 | CACCATGGCCAACTCCAAACGTT                               |
| I147 | TTAATGAGAGAGAAGCTGACGAGC                              |
| I148 | CACCATGGGGAAGAAAGGGAGTG                               |
| I149 | CTAATGATCATGCCTCCAGC                                  |
| I150 | CACCATGGGAAAAGCGTCACGG                                |
| I151 | TCAGTACCTATACCCAATTGGCA                               |
| I152 | CACCATGGGCTTTTTTCGGGAGA                               |
| I153 | CTAAACAAGAAACGAAGAATGCATC                             |
| I154 | CACCATGGGTTTCTTTGGAAGACTGTT                           |
| I155 | CTATTGAAAGAAAAGAGGATTAGAACT                           |
| I156 | CACCATGAGAAAGAATCTCACAAAATTGAC                        |
| I157 | TCACCAACGCATCCTACG                                    |
| I158 | CACCATGGGAAGAGCTGCGAGAT                               |
| I159 | CTAATTATAGAATCTAAAATCAGTCTCG                          |
| I160 | CACCATGGGCAGAGCAGCAAGAT                               |
| I161 | TTAAAGCGGATCACAGGAACA                                 |
| I162 | CACCATGGGAAAGACTCCTGGTAAATG                           |
| I163 | TCACCGTTTCCAGTCGGT                                    |
| I164 | CACCATGGGAAAGACTCCAAGTCCT                             |
| I165 | TCACTCAGCTTTCGTTGACTCA                                |
| I873 | GGTGATTUATGGGAAAGCCTGCAAGG                            |
| I874 | GGCCATTUTCATCTCTTCCACTCTACCGG                         |
| I168 | CACCATGGGGAAGTCTACAAAATGGTT                           |
| I169 | TCACCTCTTCCGCTCTGC                                    |
| I170 | CACCATGGGAAGATCTCCAGCTTCT                             |
| I171 | AAATCACCTCTGCCATTTTCTATCC                             |
| I172 | CACCATGGGTGTTACAGGAGGATTAGTC                          |
| I173 | TTAGGTGCTGCTATTTAGCTTATGTG                            |
| A027 | CACCATGAAACTCACCTATCAATTCCTTCATC                      |
| A028 | TTTATAAGCATCATATTTATTACTCTTCTTCT                      |
| I752 | GGGGACAAGTTTGTACAAAAAAGCAGGCTTCATGTCTGCAAACTTCTATATAA |
| I753 | GGGGACCACTTTGTACAAGAAAGCTGGGTCTTAGCAGAAGCAAACCTTCATT  |

## SUPPLEMENTAL DATA. Bürstenbinder et al.

|       |                                                          |
|-------|----------------------------------------------------------|
| I1378 | GGGGACAAGTTTGTACAAAAAAGCAGGCTTCATGGATACCTTAATCAAGCAGAC   |
| I1379 | GGGGACCACTTTGTACAAGAAAGCTGGGTCTCAGAAACAGCATGCATTTTC      |
| I1374 | GGGGACAAGTTTGTACAAAAAAGCAGGCTTCATGGATAATTTGGTTAAGCA      |
| I1375 | GGGGACCACTTTGTACAAGAAAGCTGGGTCTTAGTAACACCGAAAGCAGA       |
| I192  | CACCACTTCGAAGTGAACATATGGAAC                              |
| I193  | TGTTGTACAACCATCACCTGC                                    |
| I198  | CACCATCAGAATCTCTCCACTAAACCTAAT                           |
| I199  | TTTGCCAACATCACTTTCCTT                                    |
| I202  | CACCGTGTAACACGTGACAACACCA                                |
| I203  | ATTGAATTAACGTTTTCTAAAAGCG                                |
| I220  | CACCACGCAACATTTTGAGTTATTCTTTG                            |
| I221  | AATGGTTTTAGTTTGGTTTCACTTG                                |
| I1250 | GGGGACAAGTTTGTACAAAAAAGCAGGCTTCATGTTGCTCAAAGGAAGGAATAAT  |
| I1251 | GGGGACCACTTTGTACAAGAAAGCTGGGTGCCTCTCTGGCTCTTTGC          |
| I1468 | GGGGACAAGTTTGTACAAAAAAGCAGGCTTCatcagaatctctccactaaaccta  |
| I1469 | GGGGACCACTTTGTACAAGAAAGCTGGGTCCACAAATCTGTAAATTCCTTTC     |
| I1380 | GGGGACAAGTTTGTACAAAAAAGCAGGCTTCcagtaacgtagaactcactccatca |
| I1381 | GGGGACCACTTTGTACAAGAAAGCTGGGTCATGAGAGAGAAGCTGACGAGC      |
| I1382 | GGGGACAAGTTTGTACAAAAAAGCAGGCTTCACGCAACATTTTGAGTTATTCTTTG |
| I1383 | GGGGACCACTTTGTACAAGAAAGCTGGGTCCCAACGCATCCTACG            |
| I1369 | GGGGACAAGTTTGTACAAAAAAGCAGGCTTCatgcatcttaggtccataaatt    |
| I1370 | GGGGACCACTTTGTACAAGAAAGCTGGGTCCCGTTTCCAGTCGGTTCTGGT      |
| I035  | CGCTGAATCTAACGGTTTTTG                                    |
| I036  | TAGAAGCTCCCTATCATCGCC                                    |
| A004  | ATTTTGCCGATTTTCGGAAC                                     |
| I053  | ACGAAGTCGATTTTTCTCACG                                    |
| I054  | AACGCTTTTCTCGCCTTTTAC                                    |
| I409  | CGGAGCCGGTCTTCCCGGAATCA                                  |
| I410  | AGCCATCCATCGGTCAAGCCATTGT                                |
| A015  | AGCCAACCTAGGACGGATCTGGT                                  |
| A016  | CTATCCGAACCTTCTGCCTCATT                                  |
| I088  | GGCTAAGAAGAAGGGCTTGTT                                    |
| I089  | CTTCAAGGCACGTAGAGCTTTC                                   |
| I029  | TTGGCAAAATGGTGAAGAAAG                                    |
| I030  | GCTTTGAAGAGATGGCTTG                                      |
| I095  | GAGCAACGAGGTGGTTCAAG                                     |

SUPPLEMENTAL DATA. Bürstenbinder et al.

|      |                       |
|------|-----------------------|
| I096 | GCTTCCATACTCCGGAGAGTC |
| A005 | CAAAGACCAGCTCTTCCATC  |
| A006 | CTGTGAACGATTCCTGGACCT |
