# Supplementary material
Source: PubMed Central journal article supplement (PMC5338658)

Figure S4 Bürstenbinder et al.

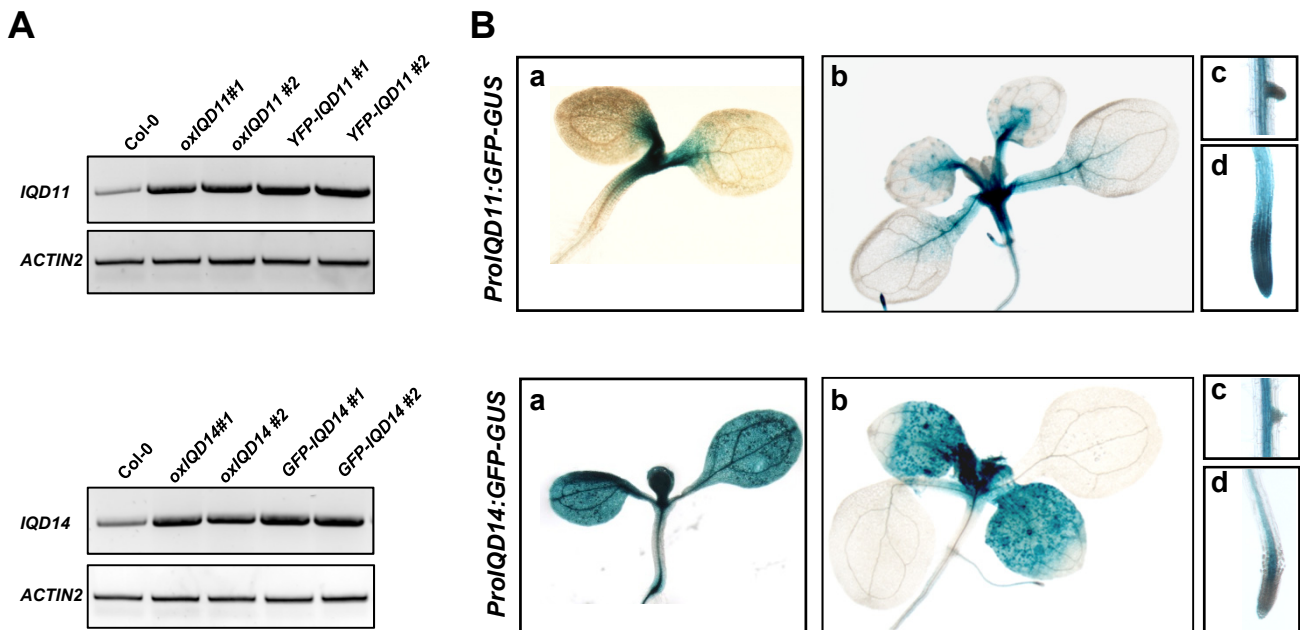

Supplement: supp_pp.16.01743_PP2016-01215DR1_Supplemental_Figure_4.pdf [file supp_pp.16.01743_PP2016-01215DR1_Supplemental_Figure_4.pdf]
